# Supplementary material for: Generation of Wheat Near-Isogenic Lines Overexpressing 1Bx7 Glutenin with Increased Protein Contents and SDS-Sedimentation Values
Source: Plants (Basel). 2023 Mar 9;12(6):1244. doi: 10.3390/plants12061244 (PMC10051937; doi:10.3390/plants12061244)
Supplement: Supplementary file 1 [file plants-12-01244-s001.zip › Supplementary File S1.xlsx]

## Sheet: Wheat accessions-UPLC
Original data shown in Figure 2
Keumkang
						HMW-GS	Retention Time	Area	% Area	Height
						10	7.801	2158268	18.32	164103
						5	10.727	2866074	24.33	216002
						8	11.066	1313790	11.15	99590
						7	11.806	3468359	29.45	241139
						2*	13.184	1972275	16.74	113145
CB337	Tamaizumi
						HMW-GS	Retention Time	Area	% Area	Height
						10	7.627	1772942	20.59	134312
						5	10.462	2236474	25.98	134945
						7	11.72	3013394	35	197182
						2*	13.06	1586723	18.43	94337
CB476	MT8191
						HMW-GS	Retention Time	Area	% Area	Height
						10	7.696	1632669	13.97	110806
						5	10.628	3079882	26.36	180590
						7	11.648	5608651	48	371851
						2*	13.07	1362489	11.66	105460
CB480	MT8195
						HMW-GS	Retention Time	Area	% Area	Height
						10	7.664	1821803	22.06	131993
						5	10.718	2498818	30.26	167579
						7	11.702	3026679	36.66	212479
						2*	13.072	909835	11.02	79346
CB508	Chisholm
						HMW-GS	Retention Time	Area	% Area	Height
						10	7.719	2240037	17.01	206282
						5	10.625	3190533	24.23	219712
						7	11.634	6428893	48.82	434583
						2*	13.068	1309013	9.94	102480
CB521	KS85WGRC01
						HMW-GS	Retention Time	Area	% Area	Height
						10	7.629	2207917	17.93	160507
						5	10.56	3193732	25.94	192494
						7	11.582	5866870	47.64	375883
						2*	13.012	1045384	8.49	82144
CB529	GR863
						HMW-GS	Retention Time	Area	% Area	Height
						10	7.611	2426586	15.56	170413
						5	10.662	3647046	23.39	230654
						7	11.583	7369494	47.27	485032
						2*	13.019	2147350	13.77	154203
CB534	K2244
						HMW-GS	Retention Time	Area	% Area	Height
						10	7.659	1885396	26.23	158641
						5	10.593	2506918	34.87	175235
						7	11.661	2796875	38.9	190070

## Sheet: NILs-UPLC
Original data shown in Figure 6
Keumkang
						HMW-GS	Retention Time	Area	% Area	Height
						10	7.839	1913097	17.98	145643
						5	10.741	2908272	27.34	199365
						8	11.069	1262940	11.87	94451
						7	11.826	2826985	26.57	198755
						2*	13.202	1726519	16.23	99454
Chisholm
						HMW-GS	Retention Time	Area	% Area	Height
						10	7.699	2434352	16.09	223587
						5	10.604	3621836	23.95	243478
						7	11.591	7322706	48.41	476325
						2*	13.048	1746437	11.55	112241
NIL (#2-1)
						HMW-GS	Retention Time	Area	% Area	Height
						10	7.699	3165386	16.97	246875
						5	10.644	4038922	21.66	310124
						7	11.638	8514727	45.66	541254
						2*	13.087	2928817	15.71	176467
NIL (#1-1)
						HMW-GS	Retention Time	Area	% Area	Height
						10	7.549	2379238	17.35	190553
						5	10.479	2791134	20.35	219051
						8	10.807	804793	5.87	51270
						7	11.528	6118679	44.61	388054
						2*	12.93	1622035	11.83	114372
NIL (#3-1)
						HMW-GS	Retention Time	Area	% Area	Height
						10	7.547	2729955	18.82	204159
						5	10.488	3229335	22.27	262787
						8	10.797	1669135	11.51	135506
						7	11.553	4478487	30.88	304630
						2*	12.942	2395863	16.52	142464
